# Supplementary material
Source: PubMed Central journal article supplement (PMC6821915)
Supplement: NIHMS1051095-supplement-Supporting_Information.pdf [file NIHMS1051095-supplement-Supporting_Information.pdf]

## Supplementary Figures

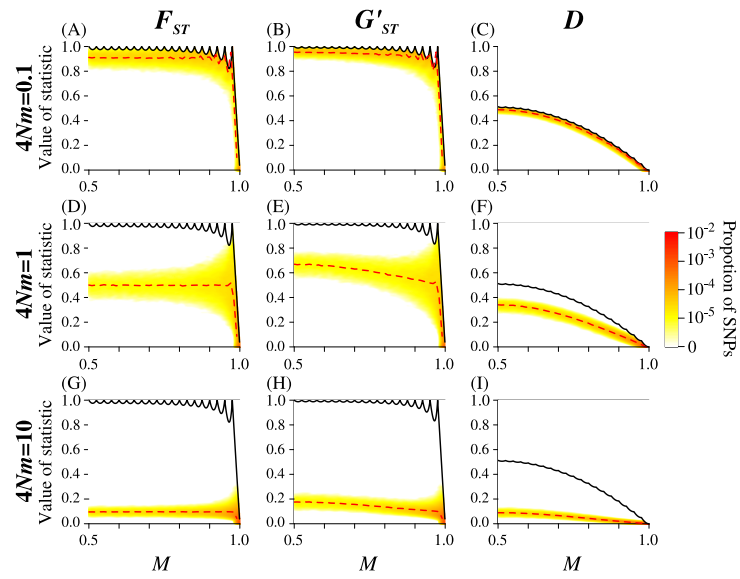

**Figure S1** Joint density of the frequency  $M$  of the most frequent allele and statistics  $F_{ST}$ ,  $G'_{ST}$ , and  $D$ , for different scaled migration rates  $4Nm$ , considering  $K = 40$  subpopulations. The simulation procedure and figure design follow Figure 3.

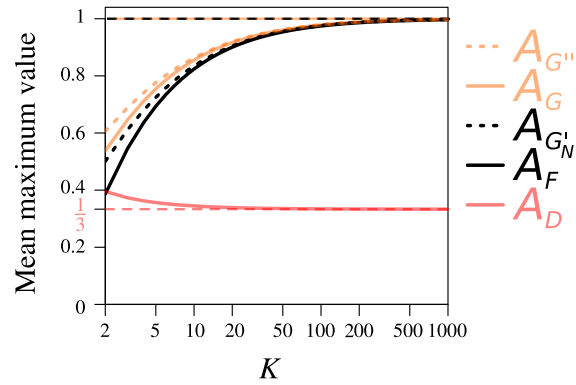

**Figure S2** The means  $A_F$ ,  $A_G$ ,  $A_D$ ,  $A_{G_N'}$ , and  $A_{G''}$  of the maximal values of  $F_{ST}$ ,  $G'_{ST}$ ,  $D$ ,  $G'_{ST,Nei}$ , and  $G''_{ST}$  respectively, over the interval  $M \in [\frac{1}{2}, 1)$ , as functions of the number of subpopulations  $K$ .  $A_F(K)$ ,  $A_G(K)$ , and  $A_D(K)$  are copied from Figure 2.  $A_{G_N'}$  and  $A_{G''}$  are computed numerically from eqs. S4.24 and S4.27. The x-axis is plotted on a logarithmic scale. The figure design follows Figure 2.

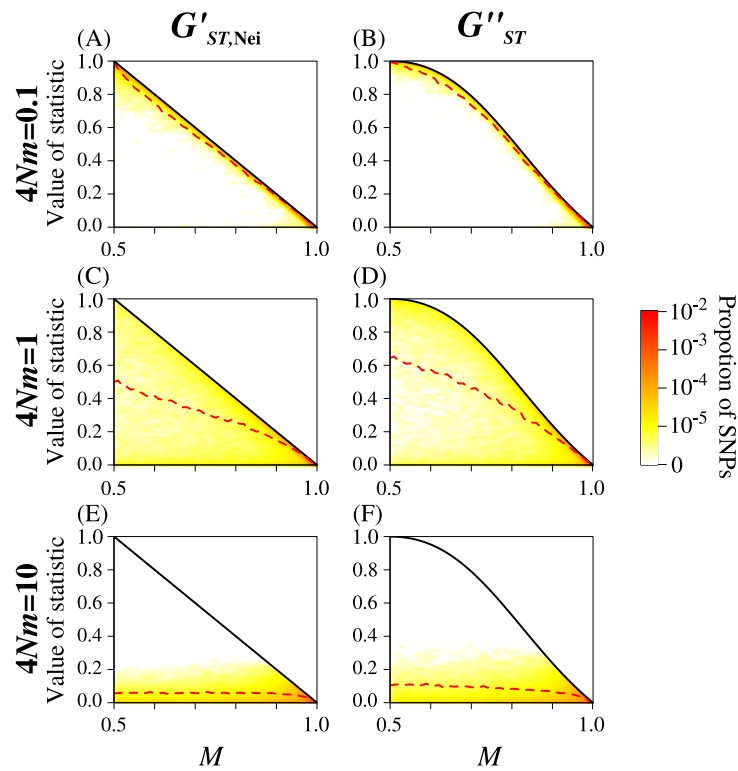

**Figure S3** Joint density of the frequency  $M$  of the most frequent allele and statistics  $G'_{ST,Nei}$  and  $G''_{ST}$ , for different scaled migration rates  $4Nm$ , considering  $K = 2$  subpopulations. The black solid line represents the maximum value of  $G'_{ST,Nei}$  and  $G''_{ST}$  in terms of  $M$  (eqs. S4.24 and S4.27); the red dashed line represents the mean  $G'_{ST,Nei}$ , and  $G''_{ST}$  in sliding windows of  $M$  of size 0.02 (plotted from 0.51 to 0.99). Colors represent the density of loci, estimated using a Gaussian kernel density estimate with a bandwidth of 0.007, with density set to 0 outside the minimum and maximum values. Loci are simulated using coalescent software MS, assuming an island model of migration and conditioning on 1 segregating site. Each panel considers 100,000 replicate simulations, with 100 lineages sampled per subpopulation. The figure design follows Figure 3.

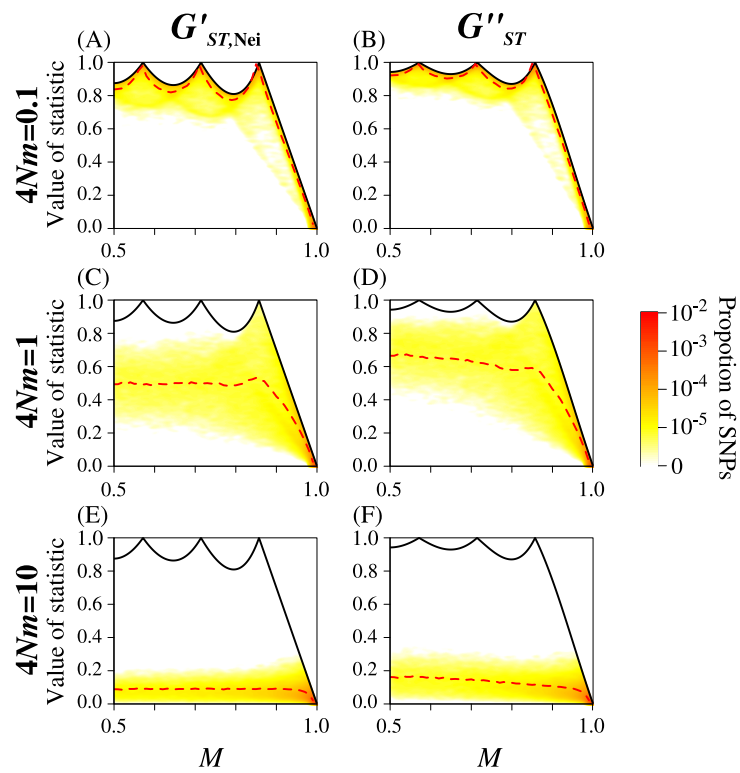

**Figure S4** Joint density of the frequency  $M$  of the most frequent allele and statistics  $G'_{ST,Nei}$  and  $G''_{ST}$ , for different scaled migration rates  $4Nm$ , considering  $K = 7$  subpopulations. The simulation procedure follows Figure S3. The figure design follows Figures 4 and S3.

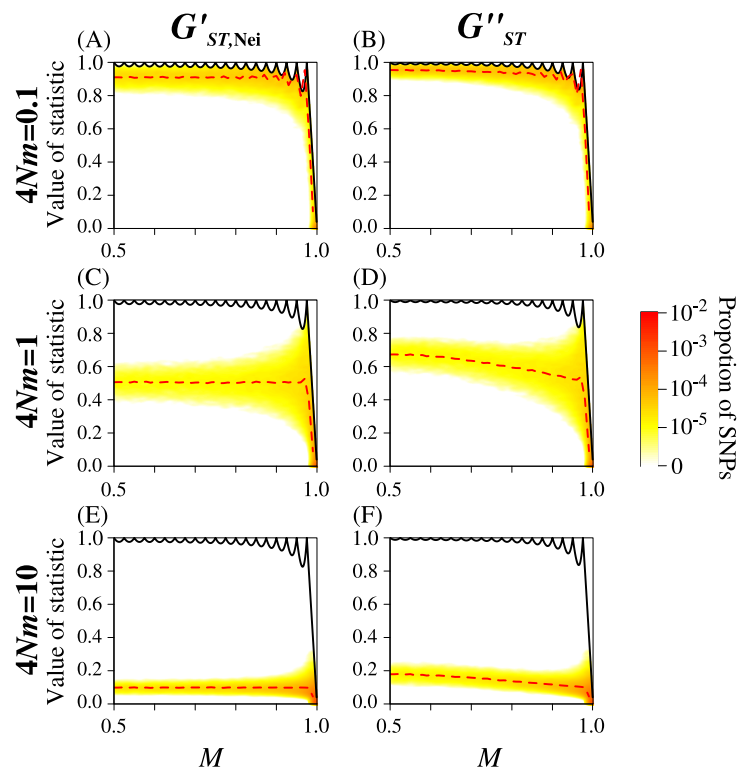

**Figure S5** Joint density of the frequency  $M$  of the most frequent allele and statistics  $G'_{ST,Nei}$  and  $G''_{ST}$ , for different scaled migration rates  $4Nm$ , considering  $K = 40$  subpopulations. The simulation procedure follows Figure S3. The figure design follows Figures S1 and S3.

## Supplementary File S1. PROPERTIES OF THE MAXIMAL VALUES OF $G'_{ST}$ AND $D$ AS FUNCTIONS OF

$M$

In this file, we derive the conditions under which the peaks (local maxima) of the maximal values of  $G'_{ST}$  (eq. 10) and  $D$  (eq. 11) in terms of  $M$  are reached, we derive their values, and we show the non-differentiability of the maximal  $G'_{ST}$  and  $D$  at the peaks.

### 1. Position and value of the peaks in the maximum value of $G'_{ST}$ as a function of $M$

From eq. 2,  $G'_{ST} = 1$  if and only if

$$\frac{(H_T - H_S)(K - 1 + H_S)}{H_T(K - 1)(1 - H_S)} = 1.$$

Solving for  $H_S$ ,  $G'_{ST} = 1$  if and only if  $H_S = 0$  or  $1 - H_S = K(1 - H_T)$ .  $H_S = 0$  leads to  $S = M$ , or  $\frac{1}{K} \sum_{k=1}^K p_k^2 = \frac{1}{K} \sum_{k=1}^K p_k$ . This equation is in turn equivalent to  $\sum_{k=1}^K p_k(1 - p_k) = 0$ . Thus,  $H_S = 0$  if and only if each  $p_k$  is equal either to 0 or to 1.

Because for all  $\frac{1}{2} \leq M < 1$ ,  $0 < H_T \leq \frac{1}{2}$ , and it follows that  $\frac{K}{2} \leq K(1 - H_T) < K$ . In addition, because  $H_S \geq 0$ ,  $1 - H_S \leq 1$ . Thus,  $1 - H_S = K(1 - H_T)$  requires that  $K = 2$ ,  $H_T = \frac{1}{2}$ , and  $H_S = 0$ , which is equivalent to having  $p_1 = 1$  and  $p_2 = 0$ , or  $p_1 = 0$  and  $p_2 = 1$ . We conclude  $G'_{ST} = 1$  if and only if all  $p_k$  are either equal to 0 or equal to 1. This condition is the same as the condition for  $F_{ST} = 1$  derived by [Alcala & Rosenberg \(2017, p. 1583\)](#), and thus leads to local maxima in the maximal value of  $G'_{ST}$  as a function of  $M$  at the same positions as the peaks in the maximum of  $F_{ST}$ : at  $M = \frac{i}{K}$ , with  $i = \lceil \frac{K}{2} \rceil, \lceil \frac{K}{2} \rceil + 1, \dots, K - 1$ .

Because the maximum value of  $G'_{ST}$  as a function of  $M$  (eq. 10) is continuous, and because it is bounded above by 1 and is equal to 1 only at the peaks, it follows that the maximum value of  $G'_{ST}$  is strictly below 1 between the peaks.

### 2. Position of the peaks in the maximum value of $D$ as a function of $M$

From eq. 3,  $D = 1$  if and only if

$$\frac{K(H_T - H_S)}{(K - 1)(1 - H_S)} = 1.$$

Solving for  $H_S$ ,  $D = 1$  if and only if  $1 - H_S = K(1 - H_T)$ . As shown in [Supplementary File S1.1](#), this condition is met if and only if  $K = 2$  and  $M = \frac{1}{2}$ , with  $p_1 = 1$  and  $p_2 = 0$ , or  $p_1 = 0$  and  $p_2 = 1$ . Thus,  $D$  values are only unconstrained in the unit interval in one specific case.

For  $i = \lfloor \frac{K}{2} \rfloor, \lfloor \frac{K}{2} \rfloor + 1, \dots, K - 1$ , we define the interval  $I_i$  by  $[\frac{1}{2}, \frac{i+1}{K}]$  for  $i = \lfloor \frac{K}{2} \rfloor$  in the case that  $K$  is odd, and by  $[\frac{i}{K}, \frac{i+1}{K}]$  for all other  $(i, K)$ . For  $M$  in  $I_i$ ,  $\lfloor KM \rfloor = i$  is constant. We denote  $x = \{KM\} = KM - i$ , so that  $M = \frac{i+x}{K}$ . Denote by  $Q_i^D(x)$  the function of  $x$  that gives the maximum value of  $D$  on interval  $I_i$  for  $M$ ,

$$Q_i^D(x) = \frac{2K(i+x^2) - 2(i+x)^2}{(K-1)[K-2x(1-x)]}, \quad (\text{S1.1})$$

where  $x$  ranges in  $[0, 1)$  (or  $[\frac{1}{2}, 1)$  in the case of odd  $K$  and  $i = \lfloor \frac{K}{2} \rfloor$ ) and integers  $K$  and  $i$  satisfy  $K \geq 2$  and  $\lfloor \frac{K}{2} \rfloor \leq i \leq K - 1$ .

$D^*(M)$  is continuous at each  $M = \frac{i}{K}$ , with  $\lim_{x \rightarrow 1^-} Q_i^D(x) = Q_{i+1}^D(0)$  for each  $i$  with  $\lfloor \frac{K}{2} \rfloor \leq i \leq K - 2$ . The derivative of  $Q_i^D(x)$  is

$$\frac{dQ_i^D(x)}{dx} = 4 \frac{(2i - K + 1)x^2 + [(K - i - 1)^2 + (i - 1)^2 + (K - 2)]x - i^2}{(K - 1)[K - 2x(1 - x)]^2}. \quad (\text{S1.2})$$

For  $x \geq 0$ ,  $\lim_{x \rightarrow 0^+} dQ_i^D(x)/dx = -4i^2/[K^2(K - 1)]$ , a strictly negative quantity for all  $K \geq 2$  and  $\lfloor \frac{K}{2} \rfloor \leq i \leq K - 1$ . In addition,  $\lim_{x \rightarrow 1^-} dQ_i^D(x)/dx = 4(K - i - 1)^2/[K^2(K - 1)]$ , a strictly positive quantity for all  $K \geq 2$  and  $\lfloor \frac{K}{2} \rfloor \leq i \leq K - 2$ . Hence, changing variables back from  $x$  to  $M$ , we see that for each point  $M = \frac{i}{K}$  where  $\lfloor \frac{K}{2} \rfloor \leq i \leq K - 1$ , the continuous

function  $D^*(M)$  has a positive derivative when approaching from the left and a negative derivative when approaching from the right. Thus,  $D^*(M)$  has a local maximum at each  $\frac{i}{K}$ .

### 3. No other peaks in the maximum value of $D$ as a function of $M$

We show that for each  $K \geq 2$ , the only peaks in  $D^*(M)$  occur at  $M = \frac{i}{K}$  for  $\lfloor \frac{K}{2} \rfloor \leq i \leq K-1$ .

For each  $i$ , we have shown that  $\lim_{x \rightarrow 0^+} dQ_i^D(x)/dx < 0$  and  $\lim_{x \rightarrow 1^-} dQ_i^D(x)/dx \geq 0$ , with equality in the latter equation if and only if  $i = K-1$ . As a smooth function on  $[0, 1]$  with the property that its derivative changes from negative to nonnegative on  $[0, 1]$ ,  $Q_i^D(x)$  has at least one critical point on  $[0, 1]$  that represents a local minimum. We show that  $Q_i^D(x)$  has no more than one critical point in  $[0, 1]$ ; because it has a local minimum, it can have no local maxima interior to the interval  $[0, 1]$ , so that  $D^*(M)$  can only have local maxima at points  $M = \frac{i}{K}$ .

The denominator of  $dQ_i^D(x)/dx$  is positive in  $[0, 1]$ . We find the roots of the numerator of  $dQ_i^D(x)/dx$  to obtain the critical points of  $Q_i^D(x)$ . Excluding the case of odd  $K$  and  $i = \lfloor \frac{K}{2} \rfloor$ , we have

$$x = \frac{-[(K-i-1)^2 + (i-1)^2 + K-2] \pm \sqrt{[(K-i-1)^2 + (i-1)^2 + K-2]^2 + 4i^2(2i-K+1)}}{2(2i-K+1)}. \quad (\text{S1.3})$$

The negative root is negative for  $K \geq 2$ , leaving only a single critical point in the interval  $[0, 1]$ .

For the case of odd  $K$  and  $i = \lfloor \frac{K}{2} \rfloor$ , the numerator of  $dQ_i^D(x)/dx$  is linear in  $x$ , with root  $x = \frac{1}{2}$ . Hence, noting that for odd  $K$  and  $i = \lfloor \frac{K}{2} \rfloor$ ,  $Q_i^G(x)$  approaches its local maximum on  $[\frac{1}{2}, 1)$  as  $x \rightarrow 1$ , on the interval  $[\frac{1}{2}, \frac{K+1}{2K})$ , a local minimum occurs at  $M = \frac{1}{2}$ .

### 4. Value of the peaks in the maximum value of $D$ as a function of $M$

For  $M = \frac{i}{K}$ , with integers  $K \geq 2$  and  $\lfloor \frac{K}{2} \rfloor \leq i \leq K-1$ , the maximal  $D$  from eq. 11 becomes

$$D^*(M) = \frac{2KM(1-M)}{K-1} = \frac{KH_T}{K-1}. \quad (\text{S1.4})$$

The function  $2KM(1-M)/(K-1)$  serves as an upper bound for  $D$  at all values of  $M$ , as  $D \leq \frac{KH_T}{K-1}$  for all  $H_S \geq 0$ , with equality if and only if  $H_S = 0$ ,  $D^*(M)$  touches the curve  $2KM(1-M)/(K-1)$  only at values  $M$  for which  $H_S$  can equal 0, or  $M = \frac{i}{K}$  for  $\lfloor \frac{K}{2} \rfloor \leq i \leq K-1$ .

### 5. Non-differentiability of the maximal values of $G'_{ST}$ and $D$ at the peaks

Because  $\lfloor KM \rfloor$  and  $\{KM\}$  are non-differentiable for  $M = \frac{i}{K}$  with  $i = \lceil \frac{K}{2} \rceil, \lceil \frac{K}{2} \rceil + 1, \dots, K-1$ , the numerators and denominators of the maximum values of  $G'_{ST}$  and  $D$  (eqs. 10 and 11) are also non-differentiable at these points, and thus, the maximal values of  $G'_{ST}$  and  $D$  are also non-differentiable at these points.

### 6. Limit of the maximal value of $G'_{ST}$

From eq. 10, for fixed  $M$  in  $[\frac{1}{2}, 1)$ , because  $0 \leq \{KM\} < 1$  and  $\lfloor KM \rfloor / (KM) \rightarrow 1$  when  $K \rightarrow \infty$ ,

$$\lim_{K \rightarrow \infty} \frac{[K(K-1) + 2\{KM\}(1-\{KM\})](\lfloor KM \rfloor + \{KM\}^2 - KM^2)}{K(K-1)[K-2\{KM\}(1-\{KM\})]M(1-M)} = 1.$$

### 7. Limit of the maximal value of $D$

Similarly, applying eqs. 5 and 11, for fixed  $M$  in  $[\frac{1}{2}, 1)$ , because  $0 \leq \{KM\} < 1$  and  $\lfloor KM \rfloor / (KM) \rightarrow 1$  when  $K \rightarrow \infty$ ,

$$\lim_{K \rightarrow \infty} \frac{2K(\lfloor KM \rfloor + \{KM\}^2 - KM^2)}{(K-1)(K-2\{KM\}(1-\{KM\}))} = 2M(1-M) = H_T.$$

## Supplementary File S2. THE SIZE OF THE PERMISSIBLE RANGE FOR $G'_{ST}$ AND $D$

This file provides the computation of the integrals  $A_G(K)$  (eq. 13) and  $A_D(K)$  (eq. 14).

### 1. Computing $A_G(K)$ (eq. 13)

$A_G(K)$  is the integral of the maximum value of  $G'_{ST}$  in terms of  $M$  (eq. 10), divided by the size range of possible  $M$  values,  $\frac{1}{2}$ :

$$A_G(K) = 2 \int_{\frac{1}{2}}^1 \left[ \frac{[K(K-1) + 2\{KM\}(1 - \{KM\})](\lfloor KM \rfloor + \{KM\}^2 - KM^2)}{K(K-1)[K - 2\{KM\}(1 - \{KM\})]M(1-M)} \right] dM. \quad (S2.1)$$

For each interval  $I_i$ , the maximum value of  $G'_{ST}$  is a smooth function

$$Q_i^G(x) = \frac{[K(K-1) + 2x(1-x)][K(i+x^2) - (i+x)^2]}{(K-1)[K - 2x(1-x)](i+x)(K-i-x)}, \quad (S2.2)$$

where  $x$  lies in  $[0, 1)$ ,  $i$  is an integer that lies in  $[\lfloor \frac{K}{2} \rfloor, \lfloor \frac{K}{2} \rfloor + 1, \dots, K-1]$ , and  $K$  is an integer greater than or equal to 2. Using the fact that  $x = KM - i$ , we obtain  $dx = K dM$ . We can break integral  $A_G(K)$  into a sum of integrals of  $Q_i^G(x)$  over intervals  $I_i$ ,

$$A_G(K) = \begin{cases} \frac{2}{K} \sum_{i=\frac{K}{2}}^{K-1} \int_0^1 Q_i^G(x) dx & \text{for even } K, \\ \frac{2}{K} \left[ \int_{\frac{1}{2}}^1 Q_{\frac{K-1}{2}}^G(x) dx + \sum_{i=\frac{K+1}{2}}^{K-1} \int_0^1 Q_i^G(x) dx \right] & \text{for odd } K. \end{cases} \quad (S2.3)$$

Because  $Q_i^G(x)$  is a rational function, we use partial fraction decomposition to compute its integral.  $Q_i^G(x)$  can be written

$$Q_i^G(x) = 1 - \frac{Kh_2(K, i)}{2(x+i)} - \frac{Kh_2(K, K-i-1)}{2(K-x-i)} - \frac{K\sqrt{2K-1}h_1(K, i)}{(2x-1)^2 + (2K-1)} - \frac{2K(2x-1)h_0(K, i)}{(2x-1)^2 + (2K-1)}. \quad (S2.4)$$

In this expression,  $h_1(K, i)$ ,  $h_2(K, i)$ , and  $h_3(K, i)$  are functions that are independent of  $x$ :

$$h_0(K, i) = \frac{K^3(2i-K+1)}{(K-1)[i^2 + (i+1)^2 + (K-1)][(K-i-1)^2 + (K-i)^2 + (K-1)]} \quad (S2.5)$$

$$h_1(K, i) = \frac{4Ki(K-i-1)[(K-i)^2 + (i+1)^2 - 1]}{(K-1)[i^2 + (i+1)^2 + (K-1)][(K-i-1)^2 + (K-i)^2 + (K-1)]\sqrt{2K-1}} \quad (S2.6)$$

$$h_2(K, i) = \frac{2i(i+1)}{K(K-1)} \left[ 1 - \frac{K^2}{i^2 + (i+1)^2 + (K-1)} \right]. \quad (S2.7)$$

Letting  $y = 2x - 1$ , we integrate by noting  $\int \frac{y}{y^2+c} dy = \frac{1}{2} \log(y^2 + c)$  and  $\int \frac{1}{y^2+c} dy = \frac{1}{\sqrt{c}} \arctan(y/\sqrt{c})$ , where  $c$  is a positive constant not dependent on  $y$ . For  $\lceil \frac{K}{2} \rceil \leq i \leq K-1$ ,

$$\frac{2}{K} \int_0^1 Q_i^G(x) dx = \frac{2}{K} - 2h_1(K, i) \arctan\left(\frac{1}{\sqrt{2K-1}}\right) + h_2(K, i) \log\left(\frac{i}{i+1}\right) + h_2(K, K-i-1) \log\left(\frac{K-i-1}{K-i}\right), \quad (S2.8)$$

and for  $i = \frac{K-1}{2}$ ,

$$\frac{2}{K} \int_{\frac{1}{2}}^1 Q_{\frac{K-1}{2}}^G(x) dx = \frac{1}{K} - h_1\left(K, \frac{K-1}{2}\right) \arctan\left(\frac{1}{\sqrt{2K-1}}\right) + h_2\left(K, \frac{K-1}{2}\right) \log\left(\frac{K-1}{K+1}\right). \quad (S2.9)$$



From eq. S2.6,  $h_1(K, i) = h_1(K, K - i - 1)$ . Consequently, for even  $K$ , we simplify the expression for  $A_G(K)$  by noting that  $\sum_{i=K/2}^{K-1} h_1(K, i) = \sum_{i=0}^{K/2-1} h_1(K, i)$ , and  $2 \sum_{i=K/2}^{K-1} h_1(K, i) = \sum_{i=0}^{K-1} h_1(K, i)$ . We can similarly simplify the expression for  $A_G(K)$  when  $K$  is odd, because  $\sum_{i=(K+1)/2}^{K-1} h_1(K, i) = \sum_{i=0}^{(K-3)/2} h_1(K, i)$ , and thus,  $[2 \sum_{i=(K+1)/2}^{K-1} h_1(K, i)] + h_1[K, \frac{K-1}{2}] = \sum_{i=0}^{K-1} h_1(K, i)$ .

Because  $\sum_{i=K/2}^{K-1} h_2(K, K - i - 1) \log[(K - i - 1)/(K - i)] = \sum_{i=0}^{K/2-1} h_2(K, i) \log[i/(i + 1)]$ , we can group terms involving  $h_2$  in the expression for  $A_G(K)$  when  $K$  is even (eq. S2.3) into a single sum  $\sum_{i=0}^{K-1} h_2(K, i) \log[i/(i + 1)]$ . Similarly, because  $\sum_{i=(K+1)/2}^{K-1} h_2(K, K - i - 1) \log[(K - i - 1)/(K - i)] = \sum_{i=0}^{(K-3)/2} h_2(K, i) \log[i/(i + 1)]$ , we can group the terms involving  $h_2$  in the expression for  $A_G(K)$  when  $K$  is odd into a sum  $\sum_{i=0}^{K-1} h_2(K, i) \log[i/(i + 1)]$ .

Substituting eqs. S2.8 and S2.9 into eq. S2.3, grouping the expressions with  $h_1$  and  $h_2$ , taking  $0 \log 0 = 0$ , and simplifying, the expressions for  $A_G(K)$  for even and odd  $K$  equalize and we obtain eq. 13.

## 2. Increase of $A_G(K)$ as a function of $K$

We must show that  $\Delta_G(K) = A_G(K + 1) - A_G(K) \geq 0$ . We numerically computed  $A_G(K)$  (eq. 13) and  $\Delta_G(K)$  for  $K$  ranging from 2 to 10,000; we found that  $\Delta_G(K) > 0$  for all  $K$  in that range.

Although this numerical result does not formally prove that  $\Delta_G(K) > 0$  for all  $K$ , we note that because  $1 \geq G'_{ST} \geq F_{ST}$  owing to the normalization in the definition of  $G'_{ST}$ ,  $1 \geq A_G(K) \geq A_F(K)$ . Hence, because  $\lim_{K \rightarrow \infty} A_F(K) = 1$ , we also have  $\lim_{K \rightarrow \infty} A_G(K) = 1$ .

## 3. Computing $A_D(K)$ (eq. 14)

$A_D(K)$  is the integral of the maximum value of  $D$  in terms of  $M$  (eq. 11), divided by the size range of possible  $M$  values,  $\frac{1}{2}$ :

$$A_D(K) = 2 \int_{\frac{1}{2}}^1 \frac{2K}{K-1} \frac{\lfloor KM \rfloor + \{KM\}^2 - KM^2}{K - 2\{KM\}(1 - \{KM\})} dM. \quad (S2.10)$$

Using  $Q_i^D(x)$  (eq. S1.1), we break  $A_D(K)$  into a sum of integrals over domains  $I_i$ ,

$$A_D(K) = \begin{cases} \frac{2}{K} \sum_{i=\frac{K}{2}}^{K-1} \int_0^1 Q_i^D(x) dx & \text{for even } K, \\ \frac{2}{K} \left[ \int_{\frac{1}{2}}^1 Q_{\frac{K-1}{2}}^D(x) dx + \sum_{i=\frac{K+1}{2}}^{K-1} \int_0^1 Q_i^D(x) dx \right] & \text{for odd } K. \end{cases} \quad (S2.11)$$

We use a partial fraction decomposition of the rational function  $Q_i^D(x)$ :

$$Q_i^D(x) = 1 - \frac{2}{K-1} \left[ \frac{(2x-1)f_1(K, i)}{(2x-1)^2 + (2K-1)} + \frac{f_2(K, i)}{(2x-1)^2 + (2K-1)} \right], \quad (S2.12)$$

where  $f_1(K, i) = 2i - K + 1$  and  $f_2(K, i) = i^2 + (K - i - 1)^2$  are functions that do not depend on  $x$ .

Letting  $y = 2x - 1$ ,  $Q_i^D(x)$  can be integrated by again applying  $\int \frac{y}{y^2+c} dy = \frac{1}{2} \log(y^2 + c)$  and  $\int \frac{1}{y^2+c} dy = \frac{1}{\sqrt{c}} \arctan(y/\sqrt{c})$ , where  $c$  is a positive constant that does not depend on  $y$ . For  $\lceil \frac{K}{2} \rceil \leq i \leq K - 1$ ,

$$\frac{2}{K} \int_0^1 Q_i^D(x) dx = \frac{2}{K} - \frac{4[i^2 + (K - 1 - i)^2]}{K(K-1)\sqrt{2K-1}} \arctan\left(\frac{1}{\sqrt{2K-1}}\right), \quad (S2.13)$$

and for  $i = \frac{K-1}{2}$ ,

$$\frac{2}{K} \int_{\frac{1}{2}}^1 Q_{\frac{K-1}{2}}^D(x) dx = \frac{1}{K} - \frac{(K-1)}{K\sqrt{2K-1}} \arctan\left(\frac{1}{\sqrt{2K-1}}\right). \quad (S2.14)$$

We can eliminate terms in  $i$  from eq. S2.11 when  $K$  is even by noting

$$\sum_{i=\frac{K}{2}}^{K-1} [i^2 + (K-1-i)^2] = \sum_{i=\frac{K}{2}}^{K-1} i^2 + \sum_{i=\frac{K}{2}}^{K-1} (K-1-i)^2 = \sum_{i=0}^{K-1} i^2. \quad (\text{S2.15})$$

Similarly, we can eliminate terms in  $i$  from the expression for  $A_D(K)$  when  $K$  is odd:

$$\sum_{i=\frac{K+1}{2}}^{K-1} [i^2 + (K-1-i)^2] = \left( \sum_{i=0}^{K-1} i^2 \right) - \left( \frac{K-1}{2} \right)^2. \quad (\text{S2.16})$$

Because  $\sum_{i=0}^{K-1} i^2 = K(K-1)(2K-1)/6$ , we substitute eqs. S2.15 and S2.16 into eq. S2.11 and simplify the sums. The expressions for  $A_D(K)$  when  $K$  is even and odd equalize, and we obtain eq. 14.

#### 4. Decrease of $A_D(K)$ as a function of $K$

To show that  $A_D(K)$  is decreasing in  $K$ , we must show that  $dA_D/dK < 0$  for all  $K \geq 2$ . From the expression for  $A_D(K)$  in eq. 14,

$$\frac{dA_D}{dK} = \frac{1}{3} \left[ \frac{1}{K} - \frac{2 \arctan\left(\frac{1}{\sqrt{2K-1}}\right)}{\sqrt{2K-1}} \right]. \quad (\text{S2.17})$$

Let  $f(x) = \arctan(x) - (x - x^3/3)$ . Because  $f(0) = 0$  and  $f'(x) = x^4/(1+x^2) > 0$ ,  $f(x) > 0$  for positive  $x$ . Hence,

$$\arctan\left(\frac{1}{\sqrt{2K-1}}\right) \geq \frac{1}{\sqrt{2K-1}} - \frac{1}{3(2K-1)^{3/2}}. \quad (\text{S2.18})$$

Applying inequality S2.18 in eq. S2.17, we obtain

$$\frac{dA_D}{dK} \leq -\frac{4K-3}{9K(2K-1)^2}, \quad (\text{S2.19})$$

which is strictly negative for all  $K \geq 2$ . We conclude that  $dA_D/dK < 0$  and hence that  $A_D(K)$  decreases monotonically as a function of  $K$ .

For the limit of  $A_D(K)$  as  $K \rightarrow \infty$ , we use l'Hôpital's rule to find  $\lim_{K \rightarrow \infty} \arctan\left(\frac{1}{\sqrt{2K-1}}\right) / \left(\frac{1}{\sqrt{2K-1}}\right) = 1$ , so that  $\lim_{K \rightarrow \infty} A_D(K) = \frac{1}{3}$ .



## Supplementary File S4. PROPERTIES OF NEI'S $G'_{ST}$ AND MEIRMANS AND HEDRICK'S $G''_{ST}$

This supplementary information file provides results regarding alternative formulations of  $F_{ST}$  and  $G'_{ST}$ —Nei's  $G'_{ST}$  and Meirmans and Hedrick's  $G''_{ST}$ —that include a multiplicative term based on the number of sampled populations  $K$ .

### Mathematical constraints on $G'_{ST}$ and $G''_{ST}$

Using  $H_T$ ,  $H_S$ , and  $D_{ST} = H_T - H_S$ , Nei (1987, pp. 188-191) defined a measure  $G'_{ST,Nei}$ :

$$\begin{aligned} D'_{ST} &= \frac{K}{K-1}(H_T - H_S) \\ H'_T &= H_S + D'_{ST} \\ G'_{ST,Nei} &= \frac{D'_{ST}}{H'_T} = \frac{K(H_T - H_S)}{KH_T - H_S}. \end{aligned}$$

From eqs. 4 and 5, substituting  $H_S = 2(M - S)$  and  $H_T = 2M(1 - M)$  for the biallelic case,  $G'_{ST,Nei}$  becomes

$$G'_{ST,Nei} = \frac{K(S - M^2)}{M(K - 1 - KM) + S}. \quad (S4.20)$$

Meirmans & Hedrick (2011, eq. 4) defined a second quantity  $G''_{ST}$  by

$$G''_{ST} = \frac{G'_{ST,Nei}}{G'_{ST,Nei,max}} = \frac{K(H_T - H_S)}{(KH_T - H_S)(1 - H_S)}. \quad (S4.21)$$

From eqs. 4 and 5, substituting  $H_S$  and  $H_T$  by their values as functions of  $M$  and  $S$ , eq. S4.21 becomes:

$$G''_{ST} = \frac{K(S - M^2)}{[M(K - 1 - KM) + S](1 - 2M + 2S)}. \quad (S4.22)$$

### Maximal values of $G'_{ST}$ and $G''_{ST}$

We first show that if  $M$  is fixed,  $G'_{ST,Nei}$  is increasing when treated as a function of  $S$ . By Theorem 1 of Alcalá & Rosenberg (2017), for fixed  $M$  and  $K$ ,  $S$  is positive, satisfying  $M^2 \leq S \leq \lceil [KM] + \{KM\}^2 \rceil / K$ . In particular, because  $\frac{1}{2} \leq M < 1$ , we have  $\frac{1}{4} \leq S \leq 1$ . The derivative of  $G'_{ST,Nei}$  with respect to  $S$  is

$$\frac{dG'_{ST,Nei}}{dS} = \frac{K(K-1)M(1-M)}{[M(K-1-KM) + S]^2}. \quad (S4.23)$$

The numerator is positive, as  $\frac{1}{2} \leq M < 1$  and  $K \geq 2$ . Noting  $H_T = 2M(1 - M)$  and  $H_S = 2(M - S)$ , the denominator equals  $\frac{1}{4}(KH_T - H_S)^2$ , a quantity that is also strictly positive, as  $H_T \geq H_S$  by the Wahlund principle,  $H_T > 0$ , and  $K \geq 2$ .  $G'_{ST,Nei}$  is therefore an increasing function of  $S$ , so that its maximum as a function of  $M$  occurs when  $S$  lies at its largest permissible value given  $M$ . For fixed  $M$ ,  $\frac{1}{2} \leq M < 1$ , Theorem 1 of Alcalá & Rosenberg (2017) gives the maximum for  $S$  as a function of  $M$ . Inserting this maximum, we have:

$$G'_{ST,Nei} \leq \frac{\lceil [KM] + \{KM\}^2 \rceil - KM^2}{KM(1 - M) - M + \lceil [KM] \rceil / K + \{KM\}^2 / K}. \quad (S4.24)$$

Similarly, we show that  $G''_{ST}$  is an increasing function of  $S$  for  $M$  in  $(\frac{1}{2}, 1)$  and integers  $K \geq 2$ . For fixed  $M$ , the derivative of  $G''_{ST}$  with respect to  $S$  is

$$\begin{aligned} \frac{dG''_{ST}}{dS} &= \frac{K[-2(S - M^2)^2 + (K-1)M(1-M)[1 - 2M(1-M)]]}{[M(K-1-KM) + S]^2(1 - 2M + 2S)^2}, \\ &= \frac{K[(K-1)H_T(1 - H_T) - (H_T - H_S)^2]}{2[M(K-1-KM) + S]^2(1 - H_S)^2}. \end{aligned} \quad (S4.25)$$

The denominator in eq. S4.25 is positive, as a product of the positive  $\frac{1}{4}(KH_T - H_S)^2$  and  $(1 - H_S)^2$  for  $0 \leq H_S \leq \frac{1}{2}$ . Hence, the sign of  $dG''_{ST}/dS$  is determined by the sign of its numerator. We find the roots of the numerator as a function of  $H_T$ , denoted  $H_{T,1}$  and  $H_{T,2}$ :

$$\begin{aligned} H_{T,1} &= \frac{K - 1 + 2H_S + \sqrt{(K - 1)[K - 1 + 4H_S(1 - H_S)]}}{2K}, \\ H_{T,2} &= \frac{K - 1 + 2H_S - \sqrt{(K - 1)[K - 1 + 4H_S(1 - H_S)]}}{2K}. \end{aligned} \quad (\text{S4.26})$$

To show that  $G''_{ST}$  is increasing in  $S$  for permissible values of  $S$ , we examine the roots. For biallelic markers,  $0 \leq H_S \leq \frac{1}{2}$ , and  $H_S(1 - H_S)$  is an increasing function of  $H_S$ . It then follows that  $H_{T,1}$  is also an increasing function of  $H_S$ . Consequently, the minimum value of  $H_{T,1}$ , treated as a function of  $H_S$ , is reached at  $H_S = 0$ , yielding  $H_{T,1} \geq (K - 1)/K \geq \frac{1}{2}$  for all  $K \geq 2$ . Because for biallelic markers  $H_T \leq \frac{1}{2}$ ,  $H_{T,1} \geq H_T$ . For  $H_{T,2}$ , because  $0 \leq H_S \leq \frac{1}{2}$ ,  $H_S(1 - H_S) \geq 0$ , and  $H_{T,2} \leq [K - 1 + 2H_S - \sqrt{(K - 1)^2}]/(2K) = H_S/K < H_S$  for all  $K \geq 2$ . Because the Wahlund principle ensures that  $H_T \geq H_S$ ,  $H_{T,2} < H_T$ .

Because the numerator of  $dG''_{ST}/dS$  is a quadratic expression in  $H_T$  with a negative leading term  $-KH_T^2$ , it is positive between its roots. We have shown that the permissible values of  $H_T$  satisfy  $H_{T,2} < H_T \leq H_{T,1}$ . Hence, the numerator of  $dG''_{ST}/dS$  is non-negative for all  $0 \leq H_S \leq \frac{1}{2}$  and  $H_S \leq H_T \leq \frac{1}{2}$ , with equality requiring  $H_T = H_{T,1} = \frac{1}{2}$ ,  $K = 2$ ,  $H_S = 0$ , and  $M = \frac{1}{2}$ .

This argument demonstrates that for each  $M \neq \frac{1}{2}$ ,  $G''_{ST}$  is an increasing function of  $S$  on the permissible interval for  $S$ . Its maximum as a function of  $M$  occurs when  $S$  lies at its largest permissible value given  $M$ . Hence, for fixed  $K \geq 2$  and fixed  $M$ ,  $\frac{1}{2} \leq M < 1$ , using Theorem 1 from [Alcala & Rosenberg \(2017\)](#) to specify this value of  $S$  given  $M$ , we substitute the maximum of  $S$  into eq. S4.20:

$$G''_{ST} \leq \frac{[KM] + \{KM\}^2 - KM^2}{[KM(1 - M) - M + [KM]/K + \{KM\}^2/K](1 - 2M + 2([KM] + \{KM\}^2)/K)}. \quad (\text{S4.27})$$

Note that for  $M = \frac{1}{2}$ , eq. S4.27 evaluates to 1, the largest possible value for  $G''_{ST}$ , so that eq. S4.27 is also valid for  $M = \frac{1}{2}$ .

### Comparison of the ranges of possible values of $F_{ST}$ , $G'_{ST}$ , $D$ , $G'_{ST,Nei}$ and $G''_{ST}$

We computed the ranges of possible values of  $G'_{ST,Nei}$  and  $G''_{ST}$ , denoted  $A_{G'_N}$  and  $A_{G''}$ , numerically, for  $K$  ranging from 2 to 10,000, using the same procedure as for  $G'_{ST}$ . Results appear in Figure S2.

### Simulation-based distributions of $G'_{ST,Nei}$ and $G''_{ST}$

We performed simulations using the same procedure as that used to produce Figures 3, 4, and S1. Results appear in Figures S3–S5.

## Literature Cited

- Alcala N, Rosenberg NA (2017) Mathematical constraints on  $F_{ST}$ : biallelic markers in arbitrarily many populations. *Genetics*, **206**, 1581–1600.
- Meirmans PG, Hedrick PW (2011) Assessing population structure:  $F_{ST}$  and related measures. *Molecular Ecology Resources*, **11**, 5–18.
- Nei M (1987) *Molecular evolutionary genetics*. Columbia university press.
